# Supplementary material for: Immunogenic mapping of rDyn-1 and rKDDR-plus proteins and selection of oligopeptides by immunoblotting for the diagnosis of Leishmania infantum-infected dogs
Source: PubMed Central journal article supplement (PMC10442149; doi:10.1371/journal.pntd.0011535), 2023-08-04
Supplement: pntd.0011535.s003.pdf [file pntd.0011535.s003.pdf]

**Table 1. Comparison of performance of diagnostic tests for CanL using a validation serum panel.**

| Antigen                   | Positive samples |       |         | Negative samples |      |                 |       | PPV (%) | NPV (%) | K     | Level of Agreement |
|---------------------------|------------------|-------|---------|------------------|------|-----------------|-------|---------|---------|-------|--------------------|
|                           | Sym.             | Asy.  | CoInfec | Bab.             | Ehr. | <i>T. cruzi</i> | NI    |         |         |       |                    |
| <b>rDyn-1 protein</b>     | 50/50            | 50/50 | 19/19   | 5/7              | 6/6  | 20/20           | 34/34 | 98.35   | 100.0   | 0.977 | Excellent          |
| <b>Mix peptides</b>       | 50/50            | 49/50 | 18/19   | 7/7              | 5/6  | 20/20           | 34/34 | 99.15   | 97.06   | 0.965 | Excellent          |
| <b>rKDDR-plus protein</b> | 50/50            | 49/50 | 19/19   | 5/7              | 6/6  | 19/20           | 34/34 | 97.52   | 98.46   | 0.953 | Excellent          |
| <b>K-plus 1 peptide</b>   | 50/50            | 50/50 | 17/19   | 7/7              | 4/6  | 19/20           | 33/34 | 96.69   | 96.92   | 0.930 | Excellent          |
| <b>Dyn-1 peptide</b>      | 50/50            | 50/50 | 18/19   | 7/7              | 6/6  | 12/20           | 34/34 | 93.65   | 98.33   | 0.893 | Excellent          |
| <b>CSA</b>                | 49/50            | 47/50 | 18/19   | 5/7              | 6/6  | 13/20           | 33/34 | 91.94   | 91.94   | 0.822 | Excellent          |
| <b>rK39</b>               | 49/50            | 47/50 | 17/19   | 5/7              | 4/6  | 17/20           | 30/34 | 91.13   | 90.32   | 0.798 | Good               |
| <b>K-plus 2 peptide</b>   | 47/50            | 45/50 | 17/19   | 4/7              | 2/6  | 13/20           | 13/34 | 75.69   | 76.19   | 0.429 | Moderate           |

Abbreviations: CSA: crude soluble antigen, Sym.: symptomatic, Asy.: asymptomatic, CoInfec.: coinfecting, Bab.: *Babesia* sp., Ehr.: *Ehrlichia* sp., NI: not infected, PPV: positive predictive value, NPV: negative predictive value, K: index kappa.
