# Supplementary material for: Immunogenic mapping of rDyn-1 and rKDDR-plus proteins and selection of oligopeptides by immunoblotting for the diagnosis of Leishmania infantum-infected dogs
Source: PubMed Central journal article supplement (PMC10442149; doi:10.1371/journal.pntd.0011535), 2023-08-04
Supplement: pntd.0011535.s004.pdf [file pntd.0011535.s004.pdf]

|          | Dyn-1 protein    |           | Mix peptides     |           | KDDR-plus protein |           | K-plus 1 peptide |           | Dyn-1 peptide    |           | CSA              |           | K39              |           | K-plus 2 peptide |           |
|----------|------------------|-----------|------------------|-----------|-------------------|-----------|------------------|-----------|------------------|-----------|------------------|-----------|------------------|-----------|------------------|-----------|
| Cutoff   | 0,4786           |           | 0,3955           |           | 0,3262            |           | 0,1822           |           | 0,4907           |           | 0,4064           |           | 1,003            |           | 0,3947           |           |
| Area     | 0.9982           |           | 0.9934           |           | 0.9823            |           | 0.9888           |           | 0.9482           |           | 0.9536           |           | 0.9686           |           | 0.8243           |           |
| 99% CI   | 0.9953 to 1.000  |           | 0.9840 to 1.000  |           | 0.9635 to 1.000   |           | 0.9742 to 1.000  |           | 0.9060 to 0.9904 |           | 0.9224 to 0.9847 |           | 0.9481 to 0.9892 |           | 0.7640 to 0.8846 |           |
| Sens.    | 100              |           | 98.32            |           | 99.16             |           | 98.32            |           | 99.16            |           | 95.8             |           | 94.96            |           | 91.6             |           |
| 99% CI   | 0.9695 to 1.000  |           | 0.9406 to 0.9980 |           | 0.95451 to 0.9998 |           | 0.9406 to .,9980 |           | 0.9541 to 0.9998 |           | 0.9047 to 0.9862 |           | 0.8935 to 0.9813 |           | 0.8509 to 0.9590 |           |
| Espc.    | 97.01            |           | 98.51            |           | 95.52             |           | 94.03            |           | 88.06            |           | 85.07            |           | 83.58            |           | 47.76            |           |
| 99% CI   | 0.8963 to 0.9964 |           | 0.9196 to 0.9996 |           | 0.8747 to 0.9907  |           | 0.8541 to 0.9835 |           | 0.7782 to 0.9470 |           | 0.7426 to 0.9260 |           | 0.7252 to 0.9151 |           | 0.3540 to 0.6033 |           |
|          | OD               | RI        | OD               | RI        | OD                | RI        | OD               | RI        | OD               | RI        | OD               | RI        | OD               | RI        | OD               | RI        |
| Sint-100 | 0,91455          | 1,9108859 | 1,21885          | 3,0817952 | 3,58665           | 10,995248 | 0,84075          | 4,6144347 | 1,7839           | 3,6354188 | 1,88165          | 4,6300443 | 3,2715           | 3,2617    | 0,8545           | 2,1649354 |
| Sint-102 | 0,6733           | 1,4068115 | 0,4775           | 1,2073325 | 1,0976            | 3,3648069 | 0,42045          | 2,307629  | 0,6758           | 1,3772162 | 0,84995          | 2,0914124 | 2,1832           | 2,17667   | 0,4277           | 1,0836078 |
| Sint-103 | 0,914            | 1,9097367 | 0,44195          | 1,1174463 | 0,6624            | 2,030656  | 0,36755          | 2,0172887 | 1,0852           | 2,2115345 | 0,7914           | 1,9473425 | 1,12585          | 1,1224826 | 0,4119           | 1,0435774 |
| Sint-104 | 1,29215          | 2,6998537 | 0,8039           | 2,0326169 | 3,6062            | 11,055181 | 0,6066           | 3,3293085 | 1,0501           | 2,1400041 | 1,5045           | 3,7020177 | 3,25505          | 3,2453141 | 0,6234           | 1,5794274 |
| Sint-105 | 0,699            | 1,4605098 | 0,5121           | 1,2948167 | 0,679             | 2,0815451 | 0,357            | 1,9593853 | 0,8572           | 1,7468922 | 0,6017           | 1,480561  | 1,23585          | 1,2321535 | 0,512            | 1,2971877 |
| Sint-106 | 1,2759           | 2,6659005 | 2,14615          | 5,4264223 | 3,69925           | 11,340435 | 1,57705          | 8,6555982 | 1,7471           | 3,5604239 | 2,1715           | 5,3432579 | 3,1711           | 3,1616152 | 0,8067           | 2,0438308 |
| Sint-107 | 1,28465          | 2,684183  | 0,9322           | 2,3570164 | 3,68375           | 11,292918 | 0,42205          | 2,3164105 | 0,9338           | 1,9029957 | 1,6327           | 4,0174705 | 3,2159           | 3,2062812 | 0,4412           | 1,117811  |
| Sint-108 | 0,80765          | 1,6875261 | 1,0274           | 2,5977244 | 0,8772            | 2,6891478 | 0,93005          | 5,1045554 | 1,5752           | 3,210108  | 0,753            | 1,8528543 | 0,811            | 0,8085743 | 0,8383           | 2,1238916 |
| Sint-109 | 0,9398           | 1,963644  | 0,5276           | 1,3340076 | 2,01075           | 6,1641631 | 0,49905          | 2,7390231 | 0,9994           | 2,0366823 | 0,81415          | 2,0033219 | 3,0556           | 3,0464606 | 0,43245          | 1,0956423 |
| Sint-110 | 0,9062           | 1,8934392 | 1,3027           | 3,2938053 | 3,59965           | 11,035101 | 0,4826           | 2,6487377 | 1,30005          | 2,6493784 | 3,01125          | 7,4095719 | 3,32755          | 3,3175972 | 0,5624           | 1,4248797 |
| Sint-111 | 0,6849           | 1,4310489 | 1,11415          | 2,817067  | 3,6481            | 11,18363  | 0,2993           | 1,6427003 | 0,5918           | 1,2060322 | 1,68885          | 4,1556348 | 3,31135          | 3,3014457 | 0,2845           | 0,7208006 |
| Sint-112 | 2,38905          | 4,9917468 | 1,3345           | 3,3742099 | 3,6762            | 11,269773 | 0,5208           | 2,8583974 | 1,1796           | 2,4039128 | 3,375            | 8,304626  | 3,29655          | 3,2866899 | 0,42715          | 1,0822143 |
| Sint-113 | 0,5649           | 1,1803176 | 0,9539           | 2,4118837 | 3,61125           | 11,070662 | 0,45675          | 2,5068606 | 0,8401           | 1,712044  | 3,22065          | 7,9248278 | 3,19545          | 3,1858923 | 0,48785          | 1,236002  |
| Sint-114 | 0,90265          | 1,8860217 | 0,7048           | 1,782048  | 2,4709            | 7,5748007 | 0,49495          | 2,7165203 | 0,8827           | 1,7988588 | 2,31285          | 5,6910679 | 3,1459           | 3,1364905 | 0,5464           | 1,3843425 |
| Sint-115 | 1,8909           | 3,9508985 | 1,22795          | 3,104804  | 3,67965           | 11,280349 | 0,3922           | 2,1525796 | 1,0236           | 2,0859996 | 2,20005          | 5,4135089 | 3,22875          | 3,2190927 | 0,384            | 0,9728908 |
| Sint-116 | 1,2534           | 2,6188884 | 1,39145          | 3,5182048 | 3,63855           | 11,154353 | 1,04325          | 5,7258507 | 2,02195          | 4,1205421 | 2,3515           | 5,7861713 | 3,2509           | 3,2411765 | 1,08995          | 2,7614644 |
| Sint-117 | 1,9905           | 4,1590054 | 1,1518           | 2,912263  | 3,56425           | 10,926579 | 0,4657           | 2,5559824 | 0,7463           | 1,5208885 | 3,28205          | 8,0759104 | 3,33585          | 3,3258724 | 0,6341           | 1,6065366 |
| Sint-118 | 2,70715          | 5,6563936 | 3,2439           | 8,2020228 | 3,5748            | 10,958921 | 3,2492           | 17,83315  | 3,3259           | 6,7778684 | 3,43845          | 8,460753  | 3,31795          | 3,3080259 | 3,32735          | 8,4300735 |
| Sint-119 | 1,10865          | 2,3164438 | 0,84125          | 2,1270544 | 3,6436            | 11,169834 | 0,4101           | 2,2508233 | 1,4449           | 2,944569  | 1,6029           | 3,9441437 | 3,3145           | 3,3045862 | 0,45895          | 1,1627819 |
| Sint-120 | 1,55665          | 3,2525073 | 1,2805           | 3,2376738 | 3,65285           | 11,198191 | 0,75125          | 4,1232162 | 1,5594           | 3,1779091 | 2,4625           | 6,0593012 | 3,2977           | 3,2878365 | 0,745            | 1,8875095 |
| Sint-122 | 3,0148           | 6,299206  | 2,2014           | 5,5661188 | 3,6789            | 11,27805  | 1,533            | 8,413831  | 2,6341           | 5,3680456 | 2,62865          | 6,4681348 | 3,2407           | 3,231007  | 1,699            | 4,3045351 |
| Sint-123 | 1,79695          | 3,7545967 | 1,15695          | 2,9252845 | 3,5176            | 10,783568 | 0,8035           | 4,409989  | 1,4725           | 3,0008152 | 2,48965          | 6,1261073 | 3,2433           | 3,2335992 | 0,6747           | 1,7093995 |
| Sint-124 | 0,7578           | 1,5833682 | 1,2512           | 3,1635904 | 3,66395           | 11,232219 | 0,632            | 3,4687157 | 1,0581           | 2,1563073 | 2,31385          | 5,6935285 | 3,2419           | 3,2322034 | 0,668            | 1,6924246 |
| Sint-125 | 2,70595          | 5,6538863 | 1,2413           | 3,1385588 | 3,62985           | 11,127682 | 0,65165          | 3,5765642 | 1,2465           | 2,5402486 | 1,95345          | 4,8067175 | 3,25645          | 3,2467099 | 0,77725          | 1,9692171 |
| Sint-126 | 1,7731           | 3,7047639 | 1,4691           | 3,7145386 | 3,5918            | 11,011036 | 0,7792           | 4,2766191 | 1,1701           | 2,3845527 | 2,01155          | 4,9496801 | 3,37125          | 3,3611665 | 0,67015          | 1,6978718 |
| Sint-127 | 0,87285          | 1,8237568 | 1,01735          | 2,5723135 | 3,5674            | 10,936235 | 1,03585          | 5,685236  | 0,9164           | 1,8675362 | 2,14785          | 5,285064  | 3,36795          | 3,3578764 | 0,6288           | 1,5931087 |
| Sint-128 | 1,40295          | 2,9313623 | 0,9608           | 2,42933   | 3,61735           | 11,089362 | 0,62895          | 3,4519759 | 2,05495          | 4,1877929 | 2,54075          | 6,2518455 | 3,3251           | 3,3151545 | 0,539            | 1,3655941 |
| Sint-129 | 0,96145          | 2,0088801 | 1,4212           | 3,593426  | 3,6698            | 11,250153 | 0,6924           | 3,8002195 | 1,89235          | 3,8564296 | 1,72275          | 4,2390502 | 3,31395          | 3,3040379 | 0,7381           | 1,8700279 |
| Sint-130 | 1,03285          | 2,1580652 | 0,9244           | 2,3372946 | 3,65825           | 11,214746 | 0,80065          | 4,3943469 | 2,9855           | 6,0841655 | 3,3133           | 8,1528051 | 3,2394           | 3,2297109 | 0,7452           | 1,8880162 |
| Sint-132 | 3,49525          | 7,3030715 | 1,62425          | 4,1068268 | 3,63445           | 11,141784 | 0,31175          | 1,7110318 | 0,7312           | 1,4901162 | 2,8605           | 7,0386319 | 3,27455          | 3,2647557 | 1,229            | 3,1137573 |
| Sint-133 | 0,96             | 2,0058504 | 0,6311           | 1,5957016 | 3,50045           | 10,730993 | 0,442            | 2,4259056 | 1,0393           | 2,1179947 | 2,5283           | 6,2212106 | 3,23575          | 3,2260718 | 0,4232           | 1,0722067 |
| Sint-136 | 0,6079           | 1,270163  | 0,5334           | 1,3486726 | 2,46375           | 7,5528817 | 0,4161           | 2,2837541 | 0,8752           | 1,7835745 | 1,363            | 3,3538386 | 3,1432           | 3,1337986 | 0,4681           | 1,185964  |
| Sint-137 | 1,29455          | 2,7048684 | 0,8825           | 2,2313527 | 3,4807            | 10,670448 | 0,4993           | 2,7403952 | 0,6455           | 1,3154677 | 1,8034           | 4,4375    | 3,35305          | 3,3430209 | 0,3712           | 0,9404611 |
| Sint-138 | 1,2692           | 2,6519014 | 0,89145          | 2,2539823 | 3,58655           | 10,994942 | 0,45855          | 2,5167398 | 1,1201           | 2,2826574 | 1,5215           | 3,7438484 | 3,36845          | 3,3583749 | 0,9031           | 2,2880669 |
| Sint-139 | 0,87465          | 1,8275178 | 0,67565          | 1,7083439 | 3,4229            | 10,493256 | 0,4322           | 2,3721186 | 0,7374           | 1,5027512 | 1,0847           | 2,6690453 | 3,3199           | 3,3099701 | 0,7075           | 1,7925006 |
| Sint-140 | 1,57785          | 3,2968032 | 1,17245          | 2,9644753 | 3,6768            | 11,271613 | 0,5607           | 3,0773875 | 2,1172           | 4,3146525 | 1,94145          | 4,77719   | 3,33145          | 3,3214855 | 0,6021           | 1,5254624 |
| Sint-142 | 1,46875          | 3,0688466 | 0,78585          | 1,9869785 | 3,6766            | 11,270999 | 0,3764           | 2,0658617 | 0,6001           | 1,2229468 | 1,3755           | 3,3845965 | 3,2822           | 3,2723829 | 0,5229           | 1,3248036 |
| Sint-A36 | 2,4876           | 5,1976598 | 1,09595          | 2,7710493 | 1,1661            | 3,5748007 | 0,90855          | 4,9865532 | 2,1415           | 4,3641736 | 0,97835          | 2,4073573 | 2,2655           | 2,2587238 | 1,03885          | 2,631999  |
| Sint-A40 | 1,4295           | 2,9868366 | 1,4471           | 3,6589128 | 3,6874            | 11,304108 | 0,6667           | 3,6591658 | 1,10075          | 2,243224  | 1,9499           | 4,7979823 | 3,27875          | 3,2689432 | 0,8263           | 2,0934887 |
| Sint-B53 | 1,24755          | 2,6066653 | 1,0992           | 2,7792668 | 3,5971            | 11,027284 | 0,7128           | 3,9121844 | 1,7169           | 3,4988792 | 2,1178           | 5,211122  | 3,29035          | 3,2805085 | 0,8655           | 2,1928047 |
| Sint-C55 | 0,92845          | 1,939929  | 0,803            | 2,0303413 | 1,6388            | 5,0239117 | 0,63875          | 3,5057629 | 1,38025          | 2,8128184 | 0,7343           | 1,8068406 | 3,08885          | 3,0796112 | 0,8592           | 2,1768432 |

|           |         |           |         |           |         |           |         |           |         |           |         |           |         |           |         |           |
|-----------|---------|-----------|---------|-----------|---------|-----------|---------|-----------|---------|-----------|---------|-----------|---------|-----------|---------|-----------|
| Sint-C56  | 0,99375 | 2,0763686 | 1,3438  | 3,3977244 | 3,52595 | 10,809166 | 1,27925 | 7,0211306 | 2,5443  | 5,1850418 | 1,24125 | 3,0542569 | 3,33735 | 3,3273679 | 1,29175 | 3,2727388 |
| Sint-C64  | 0,7602  | 1,5883828 | 1,23655 | 3,1265487 | 3,56165 | 10,918608 | 0,8476  | 4,6520307 | 1,56795 | 3,1953332 | 1,0681  | 2,6281988 | 3,27605 | 3,2662512 | 0,9794  | 2,4813783 |
| Sint-D80  | 1,6333  | 3,4126619 | 1,27605 | 3,2264223 | 3,33885 | 10,235592 | 0,96415 | 5,2917124 | 1,8134  | 3,695537  | 1,50085 | 3,6930364 | 3,2386  | 3,2289133 | 0,8143  | 2,0630859 |
| Sint-E89  | 2,2773  | 4,7582532 | 3,11635 | 7,8795196 | 3,5654  | 10,930104 | 3,0414  | 16,692645 | 3,21905 | 6,5601182 | 2,2546  | 5,5477362 | 3,2397  | 3,23001   | 2,97075 | 7,5266025 |
| Sint-E91  | 1,0159  | 2,1226494 | 0,7312  | 1,848799  | 1,7401  | 5,3344574 | 0,85475 | 4,6912733 | 1,25535 | 2,5582841 | 0,3209  | 0,7896161 | 2,69125 | 2,6832004 | 0,6654  | 1,6858373 |
| Sint-F109 | 1,9281  | 4,0286252 | 0,9618  | 2,4318584 | 3,6408  | 11,161251 | 0,66255 | 3,6363886 | 1,5108  | 3,0788669 | 1,3118  | 3,2278543 | 3,1946  | 3,1850449 | 0,83075 | 2,1047631 |
| Sint-F111 | 1,7471  | 3,6504388 | 2,74395 | 6,9379267 | 3,6718  | 11,256284 | 2,64695 | 14,527717 | 3,05945 | 6,2348686 | 2,1349  | 5,2531988 | 3,24525 | 3,2355434 | 2,9297  | 7,4225994 |
| Sint-G127 | 0,9663  | 2,0190138 | 1,29085 | 3,2638432 | 3,6747  | 11,265175 | 0,63385 | 3,4788694 | 1,11955 | 2,2815366 | 1,3424  | 3,3031496 | 3,22865 | 3,218993  | 0,6093  | 1,5437041 |
| Sint-H140 | 1,3455  | 2,8113247 | 1,54015 | 3,8941846 | 3,64695 | 11,180104 | 0,969   | 5,3183315 | 2,319   | 4,7259018 | 1,43495 | 3,5308809 | 3,24305 | 3,23335   | 1,22995 | 3,1161642 |
| Assi-05   | 1,02005 | 2,1313205 | 0,7557  | 1,9107459 | 0,9572  | 2,9343961 | 0,76335 | 4,1896268 | 1,37315 | 2,7983493 | 0,6163  | 1,5164862 | 2,7297  | 2,7215354 | 0,6289  | 1,593362  |
| Assi-16   | 0,934   | 1,9515253 | 1,0057  | 2,5428571 | 1,96375 | 6,0200797 | 1,0741  | 5,8951701 | 2,3774  | 4,8449154 | 3,00005 | 7,3820128 | 2,62045 | 2,6126122 | 0,6453  | 1,6349126 |
| Assi-26   | 1,45335 | 3,0366695 | 1,46625 | 3,7073325 | 3,64955 | 11,188075 | 0,791   | 4,3413831 | 1,2544  | 2,5563481 | 2,17635 | 5,3551919 | 3,2895  | 3,279661  | 0,6209  | 1,5730935 |
| Assi-30   | 1,01075 | 2,1118888 | 1,01145 | 2,5573957 | 3,62535 | 11,113887 | 0,6148  | 3,3743139 | 1,0589  | 2,1579376 | 1,9435  | 4,7822343 | 3,2866  | 3,2767697 | 0,4288  | 1,0863947 |
| Assi-50   | 0,77355 | 1,6162766 | 0,41935 | 1,0603034 | 0,8098  | 2,4825261 | 0,76935 | 4,2225576 | 1,851   | 3,7721622 | 0,5275  | 1,2979823 | 1,2488  | 1,2450648 | 0,6882  | 1,7436027 |
| Assi-51   | 0,58755 | 1,2276431 | 0,5218  | 1,3193426 | 0,5672  | 1,7388105 | 0,4842  | 2,6575192 | 0,7818  | 1,5932342 | 0,4194  | 1,0319882 | 2,9456  | 2,9367896 | 0,3321  | 0,8413985 |
| Assi-52   | 1,1536  | 2,4103636 | 1,5014  | 3,7962073 | 3,73995 | 11,465205 | 0,7334  | 4,025247  | 1,5608  | 3,1807622 | 1,2746  | 3,1363189 | 3,225   | 3,2153539 | 0,6646  | 1,6838105 |
| Assi-53   | 0,89165 | 1,863038  | 0,4929  | 1,2462705 | 0,60815 | 1,864347  | 0,4905  | 2,6920966 | 0,7369  | 1,5017322 | 0,3877  | 0,9539862 | 1,58295 | 1,5782154 | 0,4707  | 1,1925513 |
| Assi-54   | 1,35055 | 2,8218763 | 1,0549  | 2,6672566 | 3,57065 | 10,946199 | 0,7398  | 4,0603732 | 1,305   | 2,6594661 | 1,3252  | 3,2608268 | 3,33615 | 3,3261715 | 0,5335  | 1,3516595 |
| Assi-55   | 0,8436  | 1,762641  | 1,1718  | 2,9628319 | 0,86345 | 2,6469957 | 0,9514  | 5,2217344 | 1,7952  | 3,6584471 | 0,5411  | 1,3314469 | 0,9054  | 0,9026919 | 0,6675  | 1,6911578 |
| Assi-56   | 0,9076  | 1,8963644 | 0,63005 | 1,5930468 | 0,7147  | 2,1909871 | 0,819   | 4,4950604 | 1,29775 | 2,6446913 | 0,50645 | 1,246186  | 0,86515 | 0,8625623 | 0,91935 | 2,3292374 |
| Assi-57   | 0,94495 | 1,9744045 | 1,2206  | 3,08622   | 0,77615 | 2,3793685 | 0,8487  | 4,6580681 | 1,90585 | 3,8839413 | 0,7554  | 1,8587598 | 1,06895 | 1,0657527 | 0,74215 | 1,8802888 |
| Assi-58   | 0,498   | 1,0405349 | 0,7899  | 1,9972187 | 3,63865 | 11,15466  | 0,4827  | 2,6492865 | 0,503   | 1,0250662 | 1,9181  | 4,7197343 | 3,1183  | 3,1089731 | 0,3548  | 0,8989106 |
| Assi-59   | 1,0319  | 2,1560802 | 1,0818  | 2,7352718 | 3,68795 | 11,305794 | 0,59855 | 3,2851262 | 1,0341  | 2,1073976 | 1,6938  | 4,167815  | 3,2729  | 3,2631107 | 0,5244  | 1,328604  |
| Assi-60   | 0,99105 | 2,0707271 | 2,0536  | 5,1924147 | 3,6867  | 11,301962 | 0,9123  | 5,007135  | 1,12005 | 2,2825555 | 1,4398  | 3,542815  | 3,23785 | 3,2281655 | 2,722   | 6,896377  |
| Assi-62   | 1,0418  | 2,1767656 | 1,0881  | 2,751201  | 3,603   | 11,045371 | 0,8004  | 4,3929748 | 1,0702  | 2,180966  | 1,8468  | 4,5442913 | 3,24795 | 3,2382353 | 0,6092  | 1,5434507 |
| Assi-63   | 1,0212  | 2,1337234 | 1,2215  | 3,0884956 | 1,2134  | 3,7198038 | 1,06895 | 5,8669045 | 2,2825  | 4,6515182 | 0,6183  | 1,5214075 | 1,1562  | 1,1527418 | 0,858   | 2,1738029 |
| Assi-64   | 0,5948  | 1,2427915 | 0,45225 | 1,1434893 | 0,62175 | 1,9060392 | 0,87035 | 4,7768935 | 0,7291  | 1,4858366 | 0,45905 | 1,1295522 | 2,2064  | 2,1998006 | 0,4013  | 1,0167216 |
| Assi-65   | 2,30515 | 4,8164438 | 0,9647  | 2,4391909 | 3,5575  | 10,905886 | 0,5473  | 3,0038419 | 0,7461  | 1,5204809 | 1,4221  | 3,4992618 | 3,30965 | 3,2997507 | 1,5133  | 3,8340512 |
| Assi-66   | 0,66885 | 1,3975136 | 0,61445 | 1,553603  | 0,48905 | 1,4992336 | 0,6117  | 3,3572997 | 0,9701  | 1,9769717 | 0,5291  | 1,3019193 | 1,2529  | 1,2491525 | 0,4763  | 1,2067393 |
| Assi-67   | 2,1612  | 4,5156707 | 0,79645 | 2,01378   | 3,6076  | 11,059473 | 0,51775 | 2,8416575 | 1,0858  | 2,2127573 | 2,8114  | 6,917815  | 3,1786  | 3,1690927 | 0,5011  | 1,2695718 |
| Assi-68   | 1,94135 | 4,0563101 | 1,09445 | 2,7672566 | 3,72285 | 11,412784 | 0,5972  | 3,2777168 | 1,2633  | 2,5744854 | 1,68265 | 4,1403789 | 3,2752  | 3,2654038 | 1,1057  | 2,8013681 |
| Assi-69   | 0,7     | 1,4625992 | 0,6242  | 1,5782554 | 2,19455 | 6,7276211 | 0,4426  | 2,4291987 | 0,7251  | 1,4776849 | 0,82105 | 2,0203002 | 3,15685 | 3,1474078 | 0,4295  | 1,0881682 |
| Assi-70   | 0,8351  | 1,7448809 | 0,6307  | 1,5946903 | 0,38845 | 1,1908338 | 0,5534  | 3,0373216 | 0,5407  | 1,1018953 | 0,9215  | 2,2674705 | 0,7933  | 0,7909272 | 0,371   | 0,9399544 |
| Assi-72   | 1,19015 | 2,4867321 | 0,5006  | 1,2657396 | 1,51055 | 4,630748  | 0,4931  | 2,7063666 | 0,77015 | 1,5694926 | 1,889   | 4,6481299 | 2,09675 | 2,0904786 | 0,4118  | 1,043324  |
| Assi-73   | 0,701   | 1,4646887 | 0,6913  | 1,747914  | 3,5745  | 10,958001 | 0,4391  | 2,409989  | 0,5079  | 1,035052  | 1,2714  | 3,1284449 | 3,36875 | 3,358674  | 0,3397  | 0,8606537 |
| Assi-74   | 0,89985 | 1,8801713 | 0,84895 | 2,1465234 | 3,2165  | 9,860515  | 0,4162  | 2,284303  | 0,5466  | 1,1139189 | 0,8674  | 2,1343504 | 3,28155 | 3,2717348 | 0,3383  | 0,8571067 |
| Assi-75   | 1,2033  | 2,5142081 | 1,31185 | 3,3169406 | 3,694   | 11,324341 | 0,8035  | 4,409989  | 1,7425  | 3,5510495 | 1,1459  | 2,8196358 | 3,3535  | 3,3434696 | 0,5742  | 1,4547758 |
| Assi-76   | 1,0414  | 2,1759298 | 0,4041  | 1,0217446 | 2,0332  | 6,2329859 | 0,45405 | 2,4920417 | 0,5765  | 1,1748523 | 0,4299  | 1,0578248 | 2,7956  | 2,7872383 | 0,4495  | 1,1388396 |
| Assi-77   | 0,62575 | 1,3074593 | 0,77735 | 1,9654867 | 3,653   | 11,198651 | 0,61445 | 3,372393  | 0,8452  | 1,7224373 | 2,07765 | 5,1123278 | 3,31105 | 3,3011466 | 0,4547  | 1,1520142 |
| Assi-78   | 2,49305 | 5,2090472 | 0,99225 | 2,5088496 | 3,5928  | 11,014102 | 0,7198  | 3,9506037 | 1,4317  | 2,9176686 | 1,08565 | 2,6713829 | 3,257   | 3,2472582 | 0,7608  | 1,9275399 |
| Assi-79   | 1,2212  | 2,5516089 | 0,71835 | 1,8163085 | 3,63125 | 11,131974 | 0,43205 | 2,3712953 | 0,7439  | 1,5159976 | 1,3331  | 3,2802657 | 3,3023  | 3,2924227 | 0,4252  | 1,0772739 |
| Assi-80   | 0,70705 | 1,4773297 | 1,6908  | 4,2750948 | 3,58915 | 11,002912 | 1,0227  | 5,6130626 | 0,9649  | 1,9663746 | 0,98185 | 2,4159695 | 3,3403  | 3,3303091 | 0,8601  | 2,1791234 |
| Assi-81   | 0,7124  | 1,4885081 | 1,0264  | 2,595196  | 3,6377  | 11,151747 | 0,983   | 5,3951701 | 1,0676  | 2,1756674 | 1,83545 | 4,5163632 | 3,34565 | 3,3356431 | 0,99195 | 2,5131746 |
| Assi-82   | 2,307   | 4,8203092 | 1,47355 | 3,7257901 | 3,5923  | 11,012569 | 0,54815 | 3,0085071 | 2,3503  | 4,7896882 | 1,22535 | 3,0151329 | 3,2623  | 3,2525424 | 1,0345  | 2,620978  |
| Assi-83   | 1,2661  | 2,6454242 | 0,6289  | 1,5901391 | 3,5891  | 11,002759 | 0,352   | 1,9319429 | 0,9352  | 1,9058488 | 1,0891  | 2,679872  | 3,2657  | 3,2559322 | 0,4553  | 1,1535343 |
| Assi-D70  | 2,67355 | 5,5861889 | 0,851   | 2,1517067 | 1,46985 | 4,5059779 | 0,2962  | 1,6256861 | 1,1614  | 2,3668229 | 0,8713  | 2,1439469 | 2,90435 | 2,895663  | 0,5315  | 1,3465923 |
| Assi-E92  | 1,68    | 3,5102382 | 2,53615 | 6,4125158 | 3,4451  | 10,561312 | 1,192   | 6,5422613 | 3,0295  | 6,1738333 | 1,14685 | 2,8219734 | 3,2928  | 3,2829511 | 0,7585  | 1,9217127 |
| Assi-G122 | 1,11255 | 2,3245926 | 0,6938  | 1,7542351 | 1,24055 | 3,8030349 | 0,3091  | 1,6964874 | 1,32395 | 2,6980844 | 1,02525 | 2,5227608 | 2,56515 | 2,5574776 | 0,7517  | 1,9044844 |
| Assi-G123 | 1,67355 | 3,4967614 | 1,04125 | 2,6327434 | 1,1986  | 3,6744329 | 0,4522  | 2,481888  | 1,30605 | 2,6616059 | 0,61735 | 1,5190699 | 2,00005 | 1,9940678 | 0,66925 | 1,6955916 |
| Assi-G124 | 1,18025 | 2,4660468 | 0,76175 | 1,926043  | 1,63015 | 4,9973942 | 0,6217  | 3,4121844 | 1,38265 | 2,8177094 | 0,50795 | 1,249877  | 2,5299  | 2,522333  | 0,9293  | 2,3544464 |

|           |          |           |         |           |          |           |          |           |         |           |         |           |         |           |         |           |
|-----------|----------|-----------|---------|-----------|----------|-----------|----------|-----------|---------|-----------|---------|-----------|---------|-----------|---------|-----------|
| Assi-H132 | 1,13785  | 2,3774551 | 1,64345 | 4,1553729 | 1,3042   | 3,9981606 | 1,2113   | 6,6481888 | 3,02015 | 6,1547789 | 0,803   | 1,9758858 | 1,75555 | 1,7502991 | 1,1388  | 2,8852293 |
| Assi-H141 | 1,8823   | 3,9329294 | 1,16405 | 2,9432364 | 2,1199   | 6,4987738 | 0,2791   | 1,5318332 | 1,25835 | 2,5643978 | 3,19765 | 7,8682333 | 3,2073  | 3,1977069 | 0,64075 | 1,6233848 |
| Assi-A21  | 1,34575  | 2,8118471 | 1,01525 | 2,5670038 | 0,9206   | 2,822195  | 0,556    | 3,0515917 | 1,75105 | 3,5684736 | 0,5707  | 1,4042815 | 1,42875 | 1,4244766 | 1,1055  | 2,8008614 |
| Assi-G123 | 2,0602   | 4,3046385 | 1,0847  | 2,7426043 | 0,8639   | 2,6483752 | 0,2184   | 1,1986828 | 1,2712  | 2,5905849 | 0,58055 | 1,4285187 | 1,70525 | 1,7001496 | 0,6451  | 1,6344059 |
| Assi-G124 | 1,86875  | 3,9046176 | 0,82785 | 2,0931732 | 1,4752   | 4,5223789 | 0,3238   | 1,7771679 | 1,1771  | 2,398818  | 0,2309  | 0,5681594 | 2,20505 | 2,1984546 | 0,9423  | 2,3873828 |
| Assi-H132 | 1,63715  | 3,4207062 | 1,96415 | 4,9662453 | 0,63135  | 1,935469  | 1,09325  | 6,0002744 | 2,68445 | 5,4706542 | 0,7275  | 1,7901083 | 1,2254  | 1,2217348 | 0,9512  | 2,4099316 |
| Assi-141  | 0,64025  | 1,337756  | 0,17835 | 0,4509482 | 0,1451   | 0,4448191 | 0,4348   | 2,3863886 | 1,39705 | 2,8470552 | 0,076   | 0,1870079 | 3,16125 | 3,1517946 | 0,7845  | 1,9875855 |
| Assi-A4   | 2,303    | 4,8119515 | 1,16185 | 2,9376738 | 1,5488   | 4,7480074 | 0,601    | 3,298573  | 2,2726  | 4,631343  | 0,73205 | 1,8013041 | 2,7841  | 2,7757727 | 1,02115 | 2,5871548 |
| Assi-A15  | 1,70905  | 3,5709361 | 1,4813  | 3,7453856 | 1,8777   | 5,7562845 | 0,9362   | 5,1383095 | 2,18915 | 4,4612798 | 0,84605 | 2,0818159 | 3,23535 | 3,225673  | 1,1116  | 2,8163162 |
| B47       | 1,0929   | 2,2835353 | 0,27515 | 0,6957016 | 0,4999   | 1,5324954 | 0,22145  | 1,2154226 | 0,331   | 0,6745466 | 0,3045  | 0,7492618 | 0,6967  | 0,6946162 | 0,3636  | 0,921206  |
| B48       | 2,20145  | 4,5997702 | 1,2496  | 3,1595449 | 2,9392   | 9,0104231 | 0,7591   | 4,1663008 | 2,1353  | 4,3515386 | 0,7343  | 1,8068406 | 3,26835 | 3,2585743 | 1,2056  | 3,0544718 |
| B50       | 1,52455  | 3,1854367 | 0,6597  | 1,6680152 | 0,83475  | 2,5590129 | 0,3691   | 2,0257958 | 0,9502  | 1,9364174 | 0,45505 | 1,1197096 | 2,4088  | 2,4015952 | 0,4478  | 1,1345326 |
| B51       | 1,53925  | 3,2161513 | 1,2427  | 3,1420986 | 0,57955  | 1,7766708 | 0,3037   | 1,6668496 | 1,745   | 3,5561443 | 0,69405 | 1,7078002 | 1,06425 | 1,0610668 | 0,5739  | 1,4540157 |
| B54       | 1,89485  | 3,9591517 | 0,8146  | 2,0596713 | 1,39035  | 4,2622624 | 0,1974   | 1,0834248 | 1,5472  | 3,1530467 | 0,8292  | 2,0403543 | 2,5199  | 2,5123629 | 0,6951  | 1,7610844 |
| C65       | 1,5211   | 3,1782282 | 0,6476  | 1,637421  | 0,46475  | 1,4247394 | 0,2212   | 1,2140505 | 1,1145  | 2,2712452 | 0,6689  | 1,6459154 | 1,35345 | 1,3494018 | 0,6743  | 1,7083861 |
| D71       | 1,44715  | 3,023715  | 0,80065 | 2,0243995 | 0,61545  | 1,8867259 | 0,3342   | 1,8342481 | 1,4369  | 2,9282657 | 0,8828  | 2,1722441 | 1,52655 | 1,521984  | 0,8181  | 2,0727135 |
| D83       | 1,0946   | 2,2870873 | 0,8281  | 2,0938053 | 1,1274   | 3,4561619 | 0,3602   | 1,9769484 | 1,2292  | 2,5049929 | 0,8541  | 2,101624  | 2,8204  | 2,8119641 | 0,60365 | 1,5293894 |
| D86       | 1,39675  | 2,9184079 | 0,78135 | 1,9756005 | 1,29165  | 3,9596873 | 0,2447   | 1,3430296 | 0,93655 | 1,9086    | 0,7449  | 1,8329232 | 2,0173  | 2,0112662 | 0,5866  | 1,486192  |
| F113      | 1,2854   | 2,6857501 | 0,5142  | 1,3001264 | 0,4875   | 1,4944819 | 0,1312   | 0,7200878 | 0,7388  | 1,5056042 | 0,54135 | 1,332062  | 0,7508  | 0,7485543 | 0,58015 | 1,4698505 |
| G126      | 1,61305  | 3,370351  | 0,9892  | 2,5011378 | 3,50125  | 10,733446 | 0,1428   | 0,7837541 | 0,9439  | 1,9235786 | 1,5449  | 3,8014272 | 3,3171  | 3,3071785 | 0,6174  | 1,564226  |
| H139      | 1,0515   | 2,197033  | 0,5519  | 1,3954488 | 0,35085  | 1,0755671 | 0,3883   | 2,1311745 | 1,0051  | 2,0482983 | 0,6009  | 1,4785925 | 1,9766  | 1,9706879 | 0,5527  | 1,400304  |
| H142      | 1,1764   | 2,4580025 | 0,8209  | 2,0756005 | 2,8187   | 8,6410178 | 0,2012   | 1,104281  | 1,00735 | 2,0528836 | 0,5642  | 1,3882874 | 3,21115 | 3,2015454 | 0,7546  | 1,9118318 |
| H146      | 1,6222   | 3,3894693 | 0,646   | 1,6333755 | 0,607    | 1,8608216 | 0,3224   | 1,7694841 | 1,0618  | 2,1638476 | 0,40925 | 1,0070128 | 1,33295 | 1,3289631 | 0,643   | 1,6290854 |
| H147      | 1,0147   | 2,1201421 | 0,62805 | 1,5879899 | 0,97065  | 2,9756284 | 0,3913   | 2,14764   | 0,8935  | 1,8208681 | 0,5862  | 1,4424213 | 2,67605 | 2,6680459 | 0,3914  | 0,9916392 |
| H148      | 0,90245  | 1,8856038 | 0,6634  | 1,6773704 | 1,3228   | 4,0551809 | 0,3717   | 2,0400659 | 1,1     | 2,2416955 | 0,55875 | 1,374877  | 1,6784  | 1,6733799 | 0,7372  | 1,8677477 |
| H149      | 1,4107   | 2,9475554 | 1,26645 | 3,2021492 | 2,16615  | 6,6405579 | 0,5641   | 3,0960483 | 1,88855 | 3,8486856 | 0,8034  | 1,9768701 | 3,31765 | 3,3077268 | 0,9081  | 2,3007347 |
| H150      | 1,00585  | 2,1016506 | 0,461   | 1,1656131 | 1,91925  | 5,8836603 | 0,3491   | 1,9160263 | 0,6518  | 1,3283065 | 1,01965 | 2,5089813 | 3,2421  | 3,2324028 | 0,39675 | 1,0051938 |
| H153      | 0,9876   | 2,0635186 | 0,71    | 1,795196  | 0,706    | 2,1643164 | 0,4235   | 2,3243688 | 0,8501  | 1,7324231 | 0,5276  | 1,2982283 | 1,6967  | 1,6916251 | 0,5926  | 1,5013935 |
| Bab-1     | 0,5992   | 1,251985  | 0,1211  | 0,3061947 | -0,0325  | -0,099632 | -0,049   | -0,268935 | 0,0185  | 0,0377012 | 0,32005 | 0,7875246 | 1,2752  | 1,2713858 | 0,31785 | 0,8052952 |
| Bab-4     | 0,0656   | 0,1370664 | 0,04885 | 0,1235145 | -0,0986  | -0,302269 | -0,07385 | -0,405324 | 0,1983  | 0,4041166 | 0,1906  | 0,4689961 | 0,3775  | 0,3763709 | 0,49815 | 1,2620978 |
| Bab-8     | 0,3449   | 0,7206435 | 0,23665 | 0,5983565 | -0,00295 | -0,009044 | 0,0479   | 0,2628979 | 0,2627  | 0,5353577 | 0,3894  | 0,9581693 | 0,4032  | 0,401994  | 0,4283  | 1,0851279 |
| Bab-11    | 0,6887   | 1,4389887 | 0,27535 | 0,6962073 | 0,08745  | 0,2680871 | 0,0756   | 0,4149286 | 0,3     | 0,6113715 | 0,4798  | 1,1806102 | 0,3803  | 0,3791625 | 0,4573  | 1,1586015 |
| Bab-21    | -0,07635 | -0,159528 | 0,0065  | 0,0164349 | 0,04295  | 0,1316677 | 0,01695  | 0,0930296 | -0,2106 | -0,429183 | 0,2319  | 0,5706201 | 0,4104  | 0,4091725 | 0,26065 | 0,660375  |
| Bab-24    | 0,0761   | 0,1590054 | 0,2013  | 0,508976  | 1,64905  | 5,0553342 | 0,0372   | 0,2041712 | 0,01245 | 0,0253719 | 0,2198  | 0,5408465 | 0,8357  | 0,8332004 | 0,3248  | 0,8229035 |
| Bab-26    | 0,1896   | 0,3961555 | 0,0476  | 0,120354  | 2,76495  | 8,4762416 | 0,05845  | 0,3208013 | 0,0694  | 0,1414306 | 0,4588  | 1,128937  | 1,14385 | 1,1404287 | 0,2812  | 0,7124398 |
| Ehrl-23   | 0,09695  | 0,20257   | 0,1874  | 0,4738306 | 0,09495  | 0,2910791 | 0,15     | 0,8232711 | 0,1599  | 0,325861  | 0,2557  | 0,6291831 | 1,22755 | 1,2238784 | 0,46    | 1,1654421 |
| Ehrl-29   | -0,17245 | -0,360322 | 0,01835 | 0,046397  | -0,1705  | -0,522685 | 0,093    | 0,5104281 | 0,11    | 0,2241696 | 0,12705 | 0,312623  | 0,6459  | 0,6439681 | 0,3925  | 0,9944261 |
| Ehrl-30   | -0,0947  | -0,197869 | 0,14995 | 0,3791403 | 0,04125  | 0,1264562 | 0,1076   | 0,5905598 | 0,0872  | 0,1777053 | 0,3467  | 0,8531004 | 0,5488  | 0,5471585 | 0,4082  | 1,0342032 |
| Ehrl-34   | 0,27505  | 0,574697  | 0,7283  | 1,8414665 | 0,3015   | 0,9242796 | 0,5477   | 3,0060373 | 0,0952  | 0,1940086 | 0,3263  | 0,8029035 | 0,8933  | 0,8906281 | 0,7277  | 1,8436787 |
| Ehrl-36   | 0,0245   | 0,051191  | 0,09455 | 0,2390645 | -0,00455 | -0,013948 | 0,3079   | 1,6899012 | 0,0562  | 0,1145303 | 0,2095  | 0,515502  | 2,0697  | 2,0635095 | 0,7475  | 1,8938434 |
| Ehrl-37   | 0,17375  | 0,363038  | 0,16115 | 0,4074589 | 0,21485  | 0,658645  | 0,1167   | 0,6405049 | 0,201   | 0,4096189 | 0,3421  | 0,8417815 | 0,767   | 0,7647059 | 0,3175  | 0,8044084 |
| 61/17     | 0,0256   | 0,0534893 | 0,2235  | 0,5651075 | 0,20335  | 0,6233906 | 0,2755   | 1,5120746 | 0,1883  | 0,3837375 | 0,5409  | 1,3309547 | 1,26575 | 1,2619641 | 0,7391  | 1,8725614 |
| 5 A       | -0,0301  | -0,062892 | -0,0036 | -0,009102 | -0,0111  | -0,034028 | 0,08     | 0,4390779 | 0,6013  | 1,2253923 | 0,3437  | 0,8457185 | 0,579   | 0,5772682 | 0,3176  | 0,8046618 |
| 6 A       | -0,0097  | -0,020267 | 0,057   | 0,1441214 | -0,0586  | -0,179644 | 0,0406   | 0,2228321 | 0,26845 | 0,5470756 | 0,32635 | 0,8030266 | 0,8374  | 0,8348953 | 0,3893  | 0,9863187 |
| 8 A       | -0,07175 | -0,149916 | 0,0417  | 0,1054362 | -0,0786  | -0,240956 | 0,0801   | 0,4396268 | 0,6427  | 1,3097616 | 0,21995 | 0,5412156 | 0,6937  | 0,6916251 | 0,3781  | 0,9579427 |
| 9 A       | 0,049    | 0,1023819 | 0,0349  | 0,0882427 | 0,15545  | 0,4765481 | 0,0723   | 0,3968167 | 0,4657  | 0,9490524 | 0,2709  | 0,6665846 | 0,3126  | 0,311665  | 0,4492  | 1,1380796 |
| 14 A      | -0,1393  | -0,291057 | 0,03555 | 0,0898862 | -0,10225 | -0,313458 | -0,0246  | -0,135016 | 0,27045 | 0,5511514 | 0,18295 | 0,4501722 | 0,3506  | 0,3495513 | 0,36755 | 0,9312136 |
| 16 A      | -0,0785  | -0,16402  | 0,022   | 0,0556258 | 0,3      | 0,9196812 | -0,02525 | -0,138584 | 0,2193  | 0,4469126 | 0,19235 | 0,4733022 | 0,3654  | 0,3643071 | 0,3048  | 0,7722321 |
| 17 A      | 0,363    | 0,7584622 | 0,1633  | 0,4128951 | 0,11815  | 0,3622011 | 0,1436   | 0,7881449 | 0,227   | 0,4626044 | 0,2664  | 0,6555118 | 1,14175 | 1,138335  | 0,4078  | 1,0331898 |
| 19 A      | 0,09635  | 0,2013163 | 0,0576  | 0,1456384 | 0,0139   | 0,0426119 | 0,02435  | 0,1336443 | 0,5475  | 1,115753  | 0,31775 | 0,7818652 | 0,9325  | 0,9297109 | 0,3283  | 0,831771  |

|         |          |           |          |           |          |           |          |           |          |           |         |           |         |           |         |           |
|---------|----------|-----------|----------|-----------|----------|-----------|----------|-----------|----------|-----------|---------|-----------|---------|-----------|---------|-----------|
| 20 A    | 0,187    | 0,3907229 | 0,11675  | 0,295196  | 0,11275  | 0,3456468 | 0,01785  | 0,0979693 | 1,4313   | 2,9168535 | 0,3241  | 0,7974902 | 0,532   | 0,5304088 | 0,3403  | 0,8621738 |
| 21 A    | 0,0427   | 0,0892186 | 0,0492   | 0,1243995 | -0,0627  | -0,192213 | -0,0168  | -0,092206 | 1,6768   | 3,4171592 | 0,25855 | 0,6361959 | 0,4439  | 0,4425723 | 0,2667  | 0,6757031 |
| 4 C     | 0,07605  | 0,158901  | 0,0605   | 0,1529709 | 0,0652   | 0,1998774 | 0,033    | 0,1811196 | 0,1999   | 0,4073772 | 0,4599  | 1,1316437 | 0,6837  | 0,681655  | 0,382   | 0,9678237 |
| 5 C     | 0,0153   | 0,0319682 | 0,11755  | 0,2972187 | 0,10695  | 0,3278663 | 0,0946   | 0,5192097 | 0,0553   | 0,1126961 | 0,26    | 0,6397638 | 0,7829  | 0,7805583 | 0,3926  | 0,9946795 |
| 6 C     | -0,02725 | -0,056937 | 0,10265  | 0,2595449 | -0,0331  | -0,101471 | 0,0933   | 0,5120746 | 0,2938   | 0,5987365 | 0,2117  | 0,5209154 | 0,8674  | 0,8648056 | 0,345   | 0,8740816 |
| 11 C    | 0,1004   | 0,2097785 | 0,12715  | 0,3214918 | 0,1944   | 0,5959534 | 0,1044   | 0,5729967 | 0,2032   | 0,4141023 | 0,36145 | 0,8893947 | 0,7502  | 0,7479561 | 0,4611  | 1,168229  |
| 16 C    | 0,11745  | 0,2454033 | 0,1385   | 0,3501896 | 0,2871   | 0,8801349 | 0,1669   | 0,9160263 | 1,5236   | 3,1049521 | 1,05805 | 2,6034695 | 2,9688  | 2,9599202 | 0,4505  | 1,1413732 |
| 17 C    | 0,164    | 0,3426661 | 0,11615  | 0,2936789 | 0,9764   | 2,9932557 | 0,0226   | 0,1240395 | 1,13375  | 2,3104748 | 0,934   | 2,2982283 | 0,81575 | 0,8133101 | 0,288   | 0,7296681 |
| 19 C    | -0,03205 | -0,066966 | 0,095    | 0,2402023 | 0,16685  | 0,511496  | -0,0346  | -0,189901 | 1,7108   | 3,4864479 | 0,5928  | 1,4586614 | 0,7477  | 0,7454636 | 0,3146  | 0,7970611 |
| 21 C    | 0,2254   | 0,470957  | 0,3869   | 0,9782554 | 0,2201   | 0,6747394 | 0,0495   | 0,2716795 | 0,4783   | 0,97473   | 0,99805 | 2,4558317 | 0,8786  | 0,8759721 | 0,7159  | 1,8137826 |
| 20 C    | 0,3087   | 0,6450063 | 0,12415  | 0,3139064 | 0,16565  | 0,5078173 | -0,04165 | -0,228595 | 0,091    | 0,1854494 | 0,4543  | 1,1178642 | 0,5664  | 0,5647059 | 0,5928  | 1,5019002 |
| Neg-08  | 0,0222   | 0,0463853 | 0,0596   | 0,1506953 | 0,0657   | 0,2014102 | -0,09665 | -0,530461 | -0,0091  | -0,018545 | 0,3634  | 0,8941929 | 0,49785 | 0,4963609 | 0,35945 | 0,9106917 |
| Neg-50  | 0,0525   | 0,1096949 | 0,156    | 0,3944374 | 0,12185  | 0,3735438 | -0,0247  | -0,135565 | 0,1801   | 0,3670267 | 0,26165 | 0,6438238 | 0,71105 | 0,7089232 | 0,7629  | 1,9328604 |
| Neg-52  | 0,00695  | 0,0145215 | 0,059    | 0,1491783 | 0,0513   | 0,1572655 | -0,03555 | -0,195115 | 0,0967   | 0,1970654 | 0,2618  | 0,6441929 | 0,3833  | 0,3821535 | 0,5083  | 1,2878135 |
| Neg-53  | -0,0054  | -0,011283 | 0,0488   | 0,1233881 | 0,0975   | 0,2988964 | -0,0298  | -0,163557 | 0,0885   | 0,1803546 | 0,35585 | 0,8756152 | 0,4397  | 0,4383848 | 0,4607  | 1,1672156 |
| Neg-54  | 0,08305  | 0,173527  | 0,1831   | 0,4629583 | 0,04355  | 0,1335071 | 0,0339   | 0,1860593 | 0,2483   | 0,5060118 | 0,23705 | 0,5832923 | 0,5275  | 0,5259222 | 0,4907  | 1,2432227 |
| Neg-56  | 0,45915  | 0,9593606 | 0,08885  | 0,2246523 | 0,1161   | 0,3559166 | -0,0866  | -0,475302 | 0,0536   | 0,1092317 | 0,3121  | 0,7679626 | 0,4137  | 0,4124626 | 0,28265 | 0,7161135 |
| Neg-57  | 0,4136   | 0,8641872 | 0,16695  | 0,4221239 | 0,1735   | 0,5318823 | -0,0344  | -0,188804 | 0,1393   | 0,2838802 | 0,2815  | 0,6926673 | 0,4051  | 0,4038883 | 0,45005 | 1,1402331 |
| Neg-60  | 0,1664   | 0,3476807 | 0,076    | 0,1921618 | -0,00235 | -0,007204 | -0,073   | -0,400659 | 0,0558   | 0,1137151 | 0,2815  | 0,6926673 | 0,4577  | 0,456331  | 0,3504  | 0,8877629 |
| Neg-61  | 0,07265  | 0,1517969 | 0,1386   | 0,3504425 | 0,1086   | 0,3329246 | -0,0194  | -0,106476 | 0,0829   | 0,1689423 | 0,47175 | 1,1608022 | 0,788   | 0,7856431 | 0,4689  | 1,1879909 |
| Neg-62  | 0,06315  | 0,1319473 | 0,09595  | 0,2426043 | -0,0623  | -0,190987 | -0,09415 | -0,51674  | -0,0193  | -0,039332 | 0,2702  | 0,6648622 | 0,3107  | 0,3097707 | 0,3602  | 0,9125918 |
| Neg-64  | -0,0068  | -0,014208 | 0,11815  | 0,2987358 | -0,0873  | -0,267627 | -0,05245 | -0,28787  | 0,0117   | 0,0238435 | 0,17935 | 0,441314  | 0,3991  | 0,3979063 | 0,4967  | 1,2584241 |
| Neg-65  | -0,0196  | -0,040953 | 0,0888   | 0,2245259 | -0,0678  | -0,207848 | -0,0247  | -0,135565 | 0,1094   | 0,2229468 | 0,1502  | 0,3695866 | 0,1979  | 0,1973081 | 0,5224  | 1,3235369 |
| Neg-66  | 0,2184   | 0,456331  | 0,1877   | 0,4745891 | 0,1017   | 0,3117719 | 0,0496   | 0,2722283 | 0,1829   | 0,3727328 | 0,28955 | 0,7124754 | 0,5139  | 0,5123629 | 0,4936  | 1,2505701 |
| Neg-79  | 0,08315  | 0,1737359 | 0,1588   | 0,4015171 | 0,12715  | 0,3897915 | 0,0031   | 0,0170143 | 0,1012   | 0,206236  | 0,33425 | 0,8224656 | 0,653   | 0,6510469 | 0,4233  | 1,0724601 |
| Neg-81  | 0,158    | 0,3301295 | 0,2657   | 0,6718078 | 0,01635  | 0,0501226 | -0,06435 | -0,353183 | 0,1497   | 0,3050744 | 0,26895 | 0,6617864 | 0,3829  | 0,3817547 | 0,3759  | 0,9523689 |
| Neg-82  | -0,00195 | -0,004074 | 0,0512   | 0,1294564 | -0,05775 | -0,177039 | -0,10015 | -0,549671 | -0,0288  | -0,058692 | 0,2528  | 0,6220472 | 0,3943  | 0,3931206 | 0,31905 | 0,8083354 |
| Neg-83  | -0,0117  | -0,024446 | -0,01895 | -0,047914 | -0,10895 | -0,333998 | -0,05915 | -0,324643 | -0,08415 | -0,17149  | 0,23845 | 0,5867372 | 0,3532  | 0,3521436 | 0,3729  | 0,9447682 |
| Neg-84  | -0,04475 | -0,093502 | 0,03495  | 0,0883692 | -0,07355 | -0,225475 | -0,0258  | -0,141603 | -0,08735 | -0,178011 | 0,29405 | 0,7235482 | 0,32985 | 0,3288634 | 0,4224  | 1,0701799 |
| Neg-108 | 0,0095   | 0,0198496 | 0,0716   | 0,1810367 | 0,04155  | 0,1273758 | -0,0137  | -0,075192 | 0,0269   | 0,0548196 | 0,268   | 0,6594488 | 0,7693  | 0,766999  | 0,7017  | 1,7778059 |
| Neg-124 | 0,13705  | 0,286356  | 0,1708   | 0,4318584 | 0,0661   | 0,2026364 | 0,0616   | 0,33809   | 0,1639   | 0,3340126 | 0,30885 | 0,7599656 | 0,6443  | 0,6423729 | 0,54705 | 1,3859894 |
| Neg-131 | 0,35715  | 0,746239  | 0,36365  | 0,919469  | 0,0671   | 0,205702  | 0,0408   | 0,2239297 | 0,1545   | 0,3148563 | 0,2741  | 0,6744587 | 0,635   | 0,6331007 | 0,5089  | 1,2893337 |
| Neg-151 | 0,3456   | 0,7221061 | 0,0766   | 0,1936789 | 0,10185  | 0,3122318 | 0,06195  | 0,340011  | 0,0494   | 0,1006725 | 0,2971  | 0,7310531 | 0,6838  | 0,6817547 | 0,6333  | 1,6045098 |
| Neg-152 | 0,06585  | 0,1375888 | 0,1966   | 0,4970923 | -0,0187  | -0,057327 | 0,0792   | 0,4346872 | 0,3024   | 0,6162625 | 0,234   | 0,5757874 | 0,6811  | 0,6790628 | 0,8629  | 2,1862174 |
| Neg-153 | 0,16915  | 0,3534267 | 0,25165  | 0,6362832 | 0,08745  | 0,2680871 | -0,0042  | -0,023052 | 0,1      | 0,2037905 | 0,15865 | 0,3903789 | 1,499   | 1,4945165 | 0,5479  | 1,3881429 |
| Neg-156 | 0,04435  | 0,0926661 | 0,2255   | 0,5701643 | 0,12265  | 0,3759963 | 0,04425  | 0,242865  | -0,0383  | -0,078052 | 0,2562  | 0,6304134 | 0,6355  | 0,6335992 | 0,4272  | 1,082341  |
| Neg-157 | 0,22915  | 0,4787923 | 0,07405  | 0,1872314 | 0,21785  | 0,6678418 | -0,01005 | -0,055159 | -0,0228  | -0,046464 | 0,1759  | 0,4328248 | 0,6372  | 0,6352941 | 0,4691  | 1,1884976 |
| Neg-172 | 0,29095  | 0,6079189 | 0,35935  | 0,9085967 | 0,20335  | 0,6233906 | 0,0827   | 0,4538968 | 0,2685   | 0,5471775 | 0,35365 | 0,8702018 | 1,2764  | 1,2725823 | 0,2631  | 0,6665822 |
| Neg-159 | -0,0511  | -0,10677  | -0,0006  | -0,001517 | -0,03805 | -0,116646 | -0,0985  | -0,540615 | -0,07265 | -0,148054 | 0,21295 | 0,5239911 | 0,3153  | 0,3143569 | 0,16385 | 0,4151254 |
| Neg-160 | 0,32665  | 0,6825115 | 0,17505  | 0,4426043 | 0,1131   | 0,3467198 | 0,0744   | 0,4083425 | 0,1802   | 0,3672305 | 0,2812  | 0,6919291 | 0,7507  | 0,7484546 | 0,31955 | 0,8096022 |
| Neg-161 | 0,1399   | 0,2923109 | 0,0555   | 0,1403287 | 0,08135  | 0,2493869 | -0,0154  | -0,084523 | 0,0285   | 0,0580803 | 0,2603  | 0,640502  | 0,9417  | 0,9388833 | 0,2683  | 0,6797568 |
| Neg-166 | 0,15605  | 0,3260552 | 0,26835  | 0,6785082 | 0,1701   | 0,5214592 | 0,05945  | 0,3262898 | 0,1183   | 0,2410842 | 0,29795 | 0,7331447 | 2,3702  | 2,3631107 | 0,058   | 0,146947  |
| Neg-167 | 0,1237   | 0,2584622 | 0,21415  | 0,5414665 | 0,1959   | 0,6005518 | 0,2258   | 1,2392975 | 0,2108   | 0,4295904 | 0,26315 | 0,6475148 | 1,22215 | 1,2184945 | 0,35065 | 0,8883963 |
| Neg-171 | 0,21315  | 0,4453615 | 0,13995  | 0,3538559 | 0,20965  | 0,6427039 | -0,0022  | -0,012075 | 0,0657   | 0,1338904 | 0,40355 | 0,9929872 | 0,648   | 0,6460618 | 0,4615  | 1,1692425 |
| Neg-158 | 0,2188   | 0,4571667 | 0,1598   | 0,4040455 | 0,3      | 0,9196812 | -0,0453  | -0,248628 | 0,155    | 0,3158753 | 0,29455 | 0,7247785 | 0,5891  | 0,587338  | 0,4262  | 1,0798074 |
